# Supplementary material
Source: Springer Nature journal article supplement (https://www.springermedizin.de/resource/supplementary/12913_2009_1315_MOESM2_ESM.pdf/9527844)
Supplement: MOESM2 [file 9527844]

Mexican pesos

\$700  
\$600  
\$500  
\$400  
\$300  
\$200  
\$100  
\$0

Public  
Services

Social  
Security

Private  
Services

Public  
Services

Social  
Security

Private  
Services

Public  
Services

Social  
Security

Private  
Services

PAYMENT FOR  
CONSULTATION

PAYMENT FOR DRUGS

PAYMENT FOR TESTS

Acceptable Scenario Real Scenario

20

33

23

120

20

150

45

160

80

255

110

250

81

200

73

300

145

320
